# Supplementary material
Source: Springer Nature journal article supplement (https://www.springermedizin.de/resource/supplementary/12888_2013_1516_MOESM6_ESM.pdf/9481374)

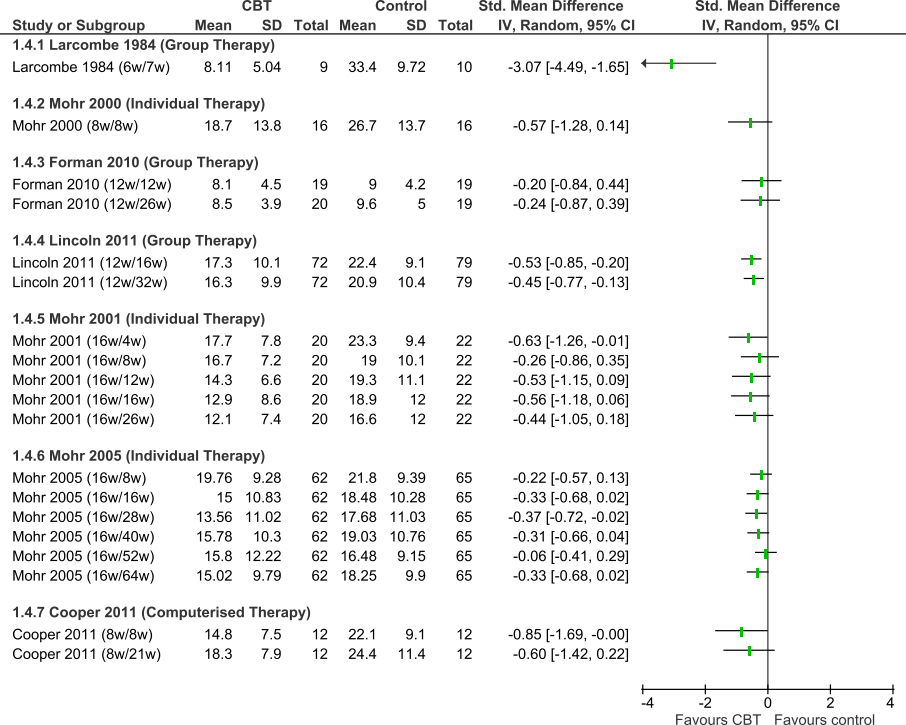

Supplement: MOESM6 [file 9481374]
